# Supplementary material
Source: PubMed Central journal article supplement (PMC7055157)
Supplement: NIHMS1563542-supplement-SI1.pdf [file NIHMS1563542-supplement-SI1.pdf]

**Supplemental Information for  
Saturation mutagenesis genome engineering of infective  $\Phi$ X174 bacteriophage via  
unamplified oligo pools and golden gate assembly**

Matthew S. Faber<sup>1</sup>, James T. Van Leuven<sup>2,3</sup>, Martina M. Ederer<sup>3</sup>, Yesol Sapozhnikov<sup>3</sup>,  
Zoë L. Wilson<sup>3</sup>, Holly A. Wichman<sup>2,3</sup>, Timothy A. Whitehead<sup>4,5</sup>, Craig R. Miller<sup>2,3\*</sup>

Affiliations: <sup>1</sup>Dept. Biochemistry and Molecular Biology, Michigan State University,  
East Lansing MI, 48824; <sup>2</sup>Institute for Modeling Collaboration and Innovation,  
University of Idaho, Moscow ID, 83844; <sup>3</sup>Dept. of Biological Sciences, University of  
Idaho, Moscow ID, 83844; <sup>4</sup>Dept. of Chemical & Biological Engineering; University of  
Colorado, Boulder, CO 80303; <sup>5</sup>Dept. of Chemical Engineering & Materials Science;  
Michigan State University, East Lansing MI, 48824

\*Correspondence to:

[jvanleuven@uidaho.edu](mailto:jvanleuven@uidaho.edu)

Department of Biological Sciences

875 Perimeter MS 3051

Moscow, Idaho 83844-3051

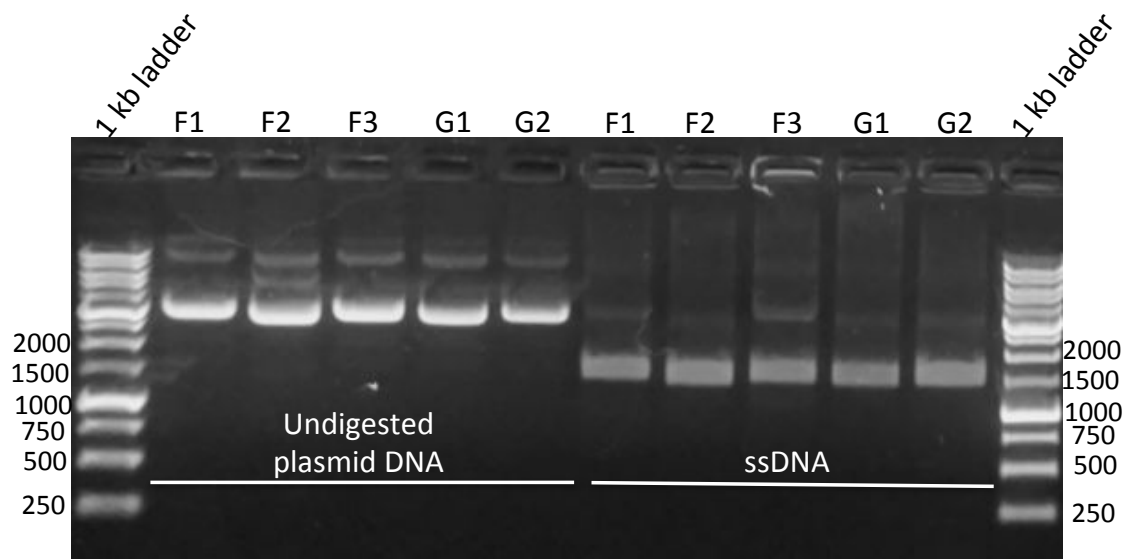

**Supplemental Figure S1. Introduction of nicking sites into shuttle vectors containing viral genes.** Verification of the introduction of the BbvCI nicking site into the shuttle vector containing the viral genes is shown by the template prep step in the nicking mutagenesis protocol (generation of ssDNA). Samples were run on a 1% agarose gel with SYBR™ Safe DNA gel stain (Invitrogen) added before casting, the ladder used is the 1 kb DNA ladder from GoldBio.



| F2 Tile 1 Heatmap of Counts |     | 0   | 50  | 100 | 250 | 500 |     |     |     |    |    |     |     |     |     |     |     |     |     |     |     |    |    |     |    |    |    |     |     |     |     |     |     |     |     |     |     |     |     |     |     |     |     |     |     |     |     |     |     |     |     |     |      |      |     |     |     |      |      |
|-----------------------------|-----|-----|-----|-----|-----|-----|-----|-----|-----|----|----|-----|-----|-----|-----|-----|-----|-----|-----|-----|-----|----|----|-----|----|----|----|-----|-----|-----|-----|-----|-----|-----|-----|-----|-----|-----|-----|-----|-----|-----|-----|-----|-----|-----|-----|-----|-----|-----|-----|-----|------|------|-----|-----|-----|------|------|
| A                           | 175 | 178 | 160 | 207 | 20  | 55  | 96  | 25  | 16  | 75 | 94 | 32  | 161 | 22  | 78  | 268 | 153 | 50  | 261 | 209 | 30  | 16 | 45 | 13  | 43 | 31 | 48 | 20  | 121 | 53  | 80  | 50  | 234 | 54  | 48  | 240 | 157 | 267 | 77  | 83  | 161 | 89  | 50  | 74  | 173 | 277 | 534 | 484 | 301 | 678 | 441 | 201 | 168  | 200  | 455 | 98  | 73  | 52   |      |
| B                           | 215 | 147 | 199 | 42  | 203 | 64  | 24  | 106 | 21  | 23 | -  | 125 | 25  | 130 | 115 | 36  | 222 | 128 | 46  | 259 | 88  | 49 | 10 | 32  | 15 | 31 | -  | 2   | 25  | 84  | 48  | 90  | 81  | 170 | 62  | 89  | 150 | -   | 122 | 68  | 57  | 28  | 113 | 70  | 69  | 200 | 257 | 410 | 453 | 319 | 473 | 428 | 166  | 234  | 187 | 256 | 89  | 95   | 67   |
| C                           | 201 | 244 | 267 | 188 | 203 | 23  | 77  | 69  | 18  | 20 | 49 | 104 | 61  | 137 | 48  | 87  | 307 | 146 | 78  | 823 | 115 | 78 | 19 | 57  | 1  | 26 | 45 | 4   | 47  | 88  | 31  | 92  | 86  | 225 | 130 | 113 | 192 | 153 | 47  | 108 | 66  | 62  | 136 | 46  | 97  | 33  | 306 | 440 | 566 | 421 | 615 | 407 | 161  | 183  | 163 | 301 | 113 | 103  | 68   |
| D                           | 178 | 216 | 144 | 77  | 142 | 71  | 97  | 85  | 254 | 60 | 62 | 86  | 62  | 170 | 82  | 67  | 270 | 159 | 72  | 257 | 107 | 93 | 14 | 55  | 20 | 32 | 7  | 50  | 69  | 551 | 120 | 138 | 194 | 75  | 75  | 160 | 199 | 129 | 409 | 85  | 31  | 201 | 57  | 125 | 232 | 287 | 398 | 660 | 369 | 318 | 228 | 227 | 1471 | 172  | 440 | 108 | 108 | 108  |      |
| E                           | 162 | 238 | 272 | 74  | 141 | 75  | 82  | -   | -   | -  | 59 | 105 | 38  | 307 | 54  | 62  | 252 | 169 | 28  | 282 | 106 | 40 | 35 | 45  | 7  | 32 | 36 | 4   | 41  | 62  | 45  | 105 | 108 | 194 | 75  | 75  | 160 | 199 | 129 | 409 | 85  | 31  | 201 | 57  | 125 | 232 | 287 | 398 | 660 | 369 | 318 | 228 | 227  | 1471 | 172 | 440 | 108 | 108  | 108  |
| F                           | 178 | 186 | 159 | 56  | 206 | 19  | 46  | 132 | 6   | 13 | 30 | 130 | 31  | 191 | 35  | 76  | 253 | 151 | 62  | 312 | 113 | 46 | 21 | 75  | 50 | 35 | 36 | -   | 23  | 73  | 47  | 121 | 80  | 151 | 96  | 86  | 147 | 215 | 167 | 95  | 126 | 25  | 128 | 63  | 71  | 227 | 343 | 332 | 492 | 334 | 515 | 376 | 227  | 183  | 233 | -   | -   | 7467 |      |
| G                           | 230 | 242 | 221 | 100 | 173 | 45  | -   | 110 | 46  | 42 | 62 | 121 | 302 | 127 | 36  | 156 | 329 | -   | 85  | 363 | 127 | 41 | 32 | 39  | 44 | 17 | 38 | 2   | 85  | 78  | 23  | 304 | 74  | 240 | 157 | 113 | 167 | 153 | 175 | 75  | 67  | 22  | 100 | 76  | -   | 241 | 262 | 526 | 598 | 385 | 537 | 477 | 389  | 162  | 308 | 342 | -   | -    | 7467 |
| H                           | 163 | 217 | 156 | 55  | 149 | 39  | 112 | 86  | 36  | 29 | 50 | 106 | 38  | 162 | 48  | 54  | 255 | 254 | 67  | 279 | 247 | 42 | 10 | 111 | 17 | 26 | 26 | 13  | 40  | 51  | 24  | 122 | 88  | 177 | 89  | 87  | 148 | 154 | 363 | 75  | 55  | 25  | 112 | 30  | 146 | 220 | 277 | -   | 368 | 343 | 649 | 411 | -    | 185  | 238 | 398 | 248 | 275  | 87   |
| I                           | 206 | 212 | 224 | 50  | 311 | 28  | 52  | -   | 19  | 20 | 46 | 133 | 37  | 180 | 40  | 131 | 291 | 152 | 71  | 344 | -   | 65 | 8  | -   | 23 | 10 | 26 | 17  | 19  | 64  | 25  | 210 | 86  | 135 | 103 | 135 | 160 | 209 | 184 | 58  | 76  | 107 | 130 | 90  | 111 | -   | 275 | 473 | 485 | 311 | 642 | 311 | 201  | 317  | 207 | 478 | 108 | 112  | 80   |
| J                           | 187 | 242 | 270 | 50  | 206 | 19  | 73  | 127 | 27  | 28 | 42 | 137 | 52  | 199 | 36  | 102 | 304 | 160 | 104 | 242 | 139 | 75 | 28 | 77  | 59 | 28 | 17 | 143 | 27  | 63  | 45  | 91  | 96  | 133 | 103 | 135 | 160 | 209 | 184 | 58  | 76  | 107 | 130 | 90  | 111 | -   | 275 | 473 | 485 | 311 | 642 | 311 | 201  | 317  | 207 | 478 | 108 | 112  | 80   |

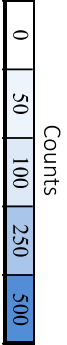

Supplementary Figure S3: F2 tile 1 heatmap of mutational frequency represented by number of sequencing read counts “counts”.







| Location | 2   | 3   | 4  | 5   | 6   | 7   | 8   | 9   | 10  | 11  | 12   | 13  | 14  | 15  | 16  | 17  | 18  | 19  | 20  | 21  | 22  | 23  | 24  | 25  | 26  | 27  | 28  | 29  | 30  | 31  | 32  | 33  | 34  | 35  | 36  | 37  | 38  | 39  | 40  | 41  | 42  | 43  | 44  | 45  | 46  | 47  | 48  | 49  | 50   | 51  | 52  | 53  |    |
|----------|-----|-----|----|-----|-----|-----|-----|-----|-----|-----|------|-----|-----|-----|-----|-----|-----|-----|-----|-----|-----|-----|-----|-----|-----|-----|-----|-----|-----|-----|-----|-----|-----|-----|-----|-----|-----|-----|-----|-----|-----|-----|-----|-----|-----|-----|-----|-----|------|-----|-----|-----|----|
| Mutation | F   | O   | T  | F   | I   | S   | R   | H   | N   | S   | N    | F   | E   | S   | D   | K   | L   | V   | T   | S   | V   | T   | P   | A   | S   | A   | P   | V   | L   | O   | T   | P   | K   | A   | T   | S   | S   | T   | Y   | F   | D   | S   | L   | T   | V   | N   | A   | G   | N    |     |     |     |    |
| ...      | 29  | 89  | 4  | 73  | 45  | 35  | 38  | 23  | 23  | 96  | 50   | 71  | 140 | 82  | 67  | 34  | 35  | 80  | 110 | 29  | 86  | 102 | 149 | 574 | 319 | 575 | 412 | 132 | 97  | 403 | 137 | 416 | 424 | 317 | 267 | 165 | 209 | 132 | 137 | 45  | 212 | 272 | 334 | 115 | 100 | 83  | 7   | 20  | 24   | 32  | 26  | 35  |    |
| F        | 30  | 6   | -  | 104 | 108 | 30  | 21  | 28  | 64  | 36  | -    | -   | 87  | 69  | 10  | 39  | 195 | 129 | 34  | 110 | 84  | 128 | 464 | 310 | 721 | 334 | 108 | 52  | 390 | 214 | 267 | 439 | 384 | 202 | 178 | 165 | 101 | 39  | 35  | 169 | 220 | -   | 142 | 125 | 177 | 12  | 697 | 21  | 39   | 42  | 49  |     |    |
| W        | 35  | 78  | 8  | 144 | 48  | 28  | 58  | 120 | 92  | 42  | 99   | 195 | 31  | 61  | 37  | 109 | 108 | 115 | 35  | 83  | 102 | 128 | 456 | 367 | 635 | 442 | 114 | 64  | 345 | 132 | 261 | 380 | 275 | 162 | 245 | 120 | 189 | 60  | 72  | 151 | 209 | 379 | 208 | 268 | 163 | 29  | 34  | 30  | 38   | 28  | 20  |     |    |
| Y        | 73  | 40  | 11 | 179 | 72  | 62  | 20  | 129 | 57  | 60  | 59   | 132 | 172 | 133 | 144 | 16  | 43  | 100 | 95  | 34  | 136 | 94  | 118 | 461 | 380 | 758 | 402 | 96  | 71  | 351 | 148 | 269 | 440 | 398 | 226 | 208 | 149 | 107 | 74  | 73  | 144 | -   | 495 | 242 | 98  | 70  | 1   | 32  | 103  | 36  | 25  | 75  |    |
| P        | 18  | 102 | 32 | 69  | 31  | 109 | 86  | 43  | 25  | 201 | 59   | 82  | 109 | 136 | 72  | 20  | 341 | 128 | 286 | 131 | 119 | 98  | 159 | -   | 355 | 663 | 515 | 147 | -   | 199 | 207 | 243 | 235 | 141 | 112 | 143 | 213 | 290 | 117 | 100 | 87  | 135 | 29  | 11  | 68  | 21  | 29  |     |      |     |     |     |    |
| M        | 44  | 85  | 16 | 75  | 79  | 27  | 26  | 25  | 47  | 43  | 90   | 90  | 132 | 55  | 80  | 65  | 398 | 99  | 117 | 61  | 84  | 115 | 126 | 471 | 281 | 605 | 577 | 89  | 52  | 339 | 205 | 305 | 517 | 360 | 222 | 204 | 256 | 162 | 46  | 204 | 118 | 231 | 337 | 133 | 212 | 178 | 464 | 19  | 23   | 31  | 39  | 99  |    |
| I        | 73  | 30  | 54 | 163 | -   | 31  | 20  | 23  | 87  | 46  | 103  | 128 | 213 | 64  | 73  | 12  | 55  | 312 | 145 | 105 | 60  | 182 | 493 | 320 | 630 | 348 | 82  | 78  | 440 | 196 | 308 | 537 | 348 | 207 | 214 | 206 | 103 | 51  | 52  | 142 | 251 | 438 | 169 | 249 | 58  | 13  | 773 | 96  | 45   | 22  | 102 |     |    |
| L        | 101 | 165 | 16 | 178 | 68  | 37  | 88  | 120 | 24  | 132 | 39   | 327 | 209 | 63  | 61  | 30  | -   | 112 | -   | 54  | 92  | 127 | 132 | 599 | 361 | 658 | 587 | 147 | 103 | 369 | -   | 493 | 493 | 424 | 189 | 190 | 202 | 300 | 125 | 92  | -   | 207 | 415 | 107 | 106 | -   | 12  | 90  | 17   | 21  | 22  | 33  |    |
| V        | 92  | 47  | 9  | 107 | 101 | 31  | 26  | 16  | 30  | 65  | 47   | 116 | 141 | 71  | 148 | 38  | 272 | -   | 134 | 57  | 73  | -   | 134 | 477 | 476 | 620 | 502 | 279 | 56  | -   | 155 | 307 | 300 | 300 | 184 | 338 | 130 | 161 | 62  | 114 | 151 | 181 | 421 | 403 | 207 | 203 | 14  | -   | 14   | 343 | 497 | 24  |    |
| A        | 23  | 69  | 63 | 140 | 38  | 63  | 58  | 17  | 28  | 99  | 65   | 87  | 183 | 84  | 116 | 29  | 129 | 210 | 97  | 134 | 77  | 183 | 244 | 539 | -   | 615 | 381 | -   | 53  | 407 | 233 | 319 | 493 | 371 | 183 | -   | 406 | 303 | 92  | 206 | 150 | 188 | 440 | 333 | 160 | 183 | 448 | 100 | 23   | -   | 65  | 26  |    |
| G        | 33  | 44  | 23 | 103 | 50  | 40  | 95  | 15  | 124 | 75  | 89   | 128 | 179 | 63  | 181 | 25  | 73  | 197 | 135 | 38  | 76  | 121 | 109 | 409 | 395 | 557 | 415 | 160 | 67  | 418 | 135 | 367 | 457 | 321 | 197 | 336 | 126 | 125 | 93  | 50  | 91  | 255 | 394 | 383 | 293 | 96  | 8   | 197 | 15   | 233 | -   | 27  |    |
| C        | 30  | 38  | 13 | 199 | 38  | 55  | 199 | 18  | 39  | 95  | 108  | 153 | 168 | 89  | 76  | 13  | 134 | 119 | 108 | 71  | 109 | 106 | 105 | 514 | 435 | 667 | 366 | 151 | 68  | 329 | 134 | 325 | 454 | 317 | 229 | 265 | 150 | 173 | 63  | 56  | 124 | 358 | 558 | 199 | 223 | 10  | 8   | 29  | 17   | 43  | 622 | 39  |    |
| S        | 80  | 43  | 36 | 134 | 66  | -   | 126 | 36  | 33  | -   | 224  | 162 | 214 | -   | 37  | 19  | 33  | 100 | 183 | 162 | -   | 117 | 206 | 553 | 457 | -   | -   | 156 | 84  | 411 | 229 | 345 | 589 | 397 | 280 | 353 | 366 | -   | 171 | 153 | -   | 151 | 160 | 271 | 174 | 106 | 74  | -   | 33   | 72  | 127 | 22  | 65 |
| T        | 32  | 25  | -  | 77  | 80  | 61  | 38  | 25  | 40  | 152 | 1824 | 88  | 118 | 87  | 54  | 10  | 37  | 106 | 156 | -   | 115 | 95  | -   | 697 | 448 | 767 | 457 | 692 | 140 | 299 | 158 | 377 | -   | 398 | 275 | 242 | -   | 171 | 153 | -   | 151 | 160 | 271 | 174 | 106 | 74  | -   | 33  | 72   | 127 | 22  | 65  |    |
| N        | 43  | 52  | 14 | 68  | 81  | 18  | 52  | 55  | -   | 60  | -    | 93  | 141 | 79  | 128 | 48  | 24  | 100 | 151 | 66  | 94  | 112 | 157 | 534 | 325 | 676 | 419 | 90  | 59  | 339 | 154 | 294 | 470 | 356 | 350 | 172 | 213 | 111 | 80  | 65  | 102 | 223 | 385 | 205 | 187 | 61  | 15  | 31  | -    | 37  | 27  | -   |    |
| Q        | 41  | -   | 7  | 68  | 31  | 23  | 76  | 70  | 38  | 92  | 74   | 116 | 132 | 54  | 113 | 40  | 274 | 112 | 126 | 38  | 52  | 151 | 131 | 492 | 318 | 609 | 548 | 138 | 77  | 312 | 199 | -   | 450 | 331 | 271 | 183 | 175 | 160 | 53  | 73  | 150 | 175 | 324 | 179 | 199 | 136 | 4   | 28  | 29   | 22  | 34  | 44  |    |
| D        | 42  | 42  | 24 | 109 | 52  | 38  | 41  | 26  | 91  | 112 | 85   | 149 | 207 | 111 | -   | 14  | 47  | 237 | 116 | 39  | 101 | 184 | 143 | 459 | 523 | 587 | 495 | 75  | 96  | 439 | 158 | 304 | 453 | 368 | 269 | 437 | 186 | 97  | 59  | 56  | 137 | 278 | 428 | -   | 181 | 57  | 6   | 163 | 139  | 828 | 143 | 128 |    |
| E        | 31  | 57  | 19 | 122 | 44  | 33  | 33  | 11  | 29  | 134 | 65   | 92  | 170 | 62  | 214 | 116 | 26  | 166 | 131 | 47  | 80  | 105 | 126 | 659 | 355 | 655 | 343 | 149 | 50  | 354 | 167 | 319 | 534 | 311 | 337 | 302 | 259 | 101 | 87  | 70  | 174 | 208 | 447 | 337 | 154 | 72  | 8   | 64  | 33   | 44  | 29  | 44  |    |
| H        | 50  | 100 | 26 | 86  | 55  | 41  | 280 | -   | 49  | 92  | 55   | 96  | 146 | 98  | 134 | 10  | 172 | 112 | 220 | 63  | 122 | 91  | 142 | 558 | 380 | 725 | 333 | 118 | 154 | 345 | 181 | 409 | 539 | 441 | 286 | 274 | 191 | 122 | 55  | 86  | 102 | 300 | 397 | 247 | 152 | 63  | 6   | 33  | 52   | 38  | 23  | 75  |    |
| K        | 13  | 33  | 15 | 75  | 33  | 14  | 22  | 12  | 48  | 51  | 114  | 85  | 140 | 56  | 67  | -   | 31  | 82  | 90  | 53  | 74  | 83  | 163 | 545 | 304 | 683 | 336 | 93  | 66  | 344 | 160 | 361 | 580 | 296 | -   | 169 | 347 | 102 | 56  | 79  | 149 | 199 | 297 | 123 | 155 | 48  | 303 | 29  | 1175 | 28  | 44  | 645 |    |
| R        | 34  | 188 | 16 | 94  | 35  | 37  | -   | 99  | 35  | 75  | 101  | 94  | 144 | 52  | 84  | 52  | 299 | 104 | 224 | 54  | 72  | 111 | 116 | 531 | 412 | 646 | 403 | 137 | 113 | 356 | 145 | 542 | 536 | 404 | 260 | 336 | 183 | 136 | 55  | 90  | 126 | 216 | 403 | 156 | 201 | 84  | 199 | 23  | 26   | 69  | 86  | 34  |    |

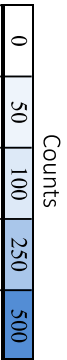

Supplementary Figure S7: G1 file 1 heatmap of mutational frequency represented by number of sequencing read counts “counts”.





| G2 heatmap of counts |          |      |     |      |     |      |      |      |     |     |     |     |     |     |      |     |     |     |     |     |     |     |     |      |      |     |      |      |      |      |      |      |     |     |     |     |     |     |     |     |     |   |
|----------------------|----------|------|-----|------|-----|------|------|------|-----|-----|-----|-----|-----|-----|------|-----|-----|-----|-----|-----|-----|-----|-----|------|------|-----|------|------|------|------|------|------|-----|-----|-----|-----|-----|-----|-----|-----|-----|---|
| Location             | Mutation | P    | G   | N    | N   | V    | Y    | Y    | G   | F   | M   | V   | W   | S   | N    | N   | F   | T   | A   | T   | K   | C   | R   | G    | L    | V   | S    | L    | N    | Q    | V    | I    | K   | E   | I   | I   | C   | L   | Q   | P   | L   | K |
| *                    |          | 880  | 725 | 785  | 330 | 686  | 1018 | 769  | 660 | 607 | 348 | 82  | 241 | 504 | 163  | 839 | 422 | 599 | 645 | 651 | 706 | 390 | 844 | 360  | 1176 | 486 | 457  | 879  | 756  | 980  | 829  | 1454 | 576 | 458 | 232 | 172 | 174 | 240 | 164 | 252 | 522 |   |
| F                    | 623      | 548  | 782 | 243  | 585 | 1000 | 767  | 771  | -   | 372 | 147 | 182 | 477 | 156 | -    | 378 | 444 | 713 | 421 | 607 | 311 | 627 | 311 | 1175 | 464  | 304 | 871  | 573  | 987  | 842  | 1018 | 448  | 683 | 525 | 154 | 183 | 112 | 72  | 293 | 386 |     |   |
| W                    | 724      | 708  | 612 | 276  | 788 | 934  | 697  | 1100 | 592 | 508 | 86  | -   | 362 | 135 | 890  | 391 | 579 | 700 | 519 | 713 | 281 | 645 | 327 | 841  | 601  | 445 | 850  | 908  | 845  | 691  | 1128 | 1060 | 383 | 215 | 524 | 135 | 278 | 135 | 203 | 467 |     |   |
| Y                    | 733      | 604  | 895 | 380  | 720 | -    | 793  | 668  | 554 | 425 | 109 | 215 | 493 | 175 | 984  | 439 | 563 | 679 | 551 | 665 | 385 | 665 | 332 | 1140 | 537  | 309 | 1121 | 661  | 1050 | 757  | 1218 | 408  | 536 | 426 | 202 | 140 | 120 | 152 | 261 | 367 |     |   |
| P                    | -        | 757  | 689 | 227  | 776 | 882  | 822  | 950  | 610 | 513 | 92  | 293 | 568 | 184 | 964  | 496 | 543 | 859 | 529 | 560 | 329 | 638 | 378 | 1078 | 715  | 702 | 936  | 1093 | 1073 | 751  | 1263 | 1015 | 442 | 256 | 118 | 326 | 361 | -   | 292 | 520 |     |   |
| M                    | 878      | 700  | 894 | 250  | 765 | 946  | 743  | 866  | 544 | -   | 107 | 259 | 400 | 184 | 1001 | 390 | 525 | 823 | 627 | 692 | 352 | 703 | 365 | 1090 | 655  | 585 | 1110 | 890  | 1094 | 1022 | 1175 | 1039 | 834 | 566 | 164 | 213 | 291 | 158 | 255 | 527 |     |   |
| I                    | 716      | 648  | 825 | 454  | 722 | 970  | 830  | 753  | 550 | 660 | 158 | 181 | 405 | 142 | 1072 | 544 | 594 | 594 | 554 | 561 | 344 | 658 | 278 | 1217 | 446  | 388 | 1147 | 663  | 1163 | -    | 1406 | 468  | -   | -   | 146 | 248 | 122 | 66  | 323 | 485 |     |   |
| L                    | 910      | 771  | 723 | 358  | 682 | 962  | 752  | 839  | 642 | 668 | 101 | 243 | 466 | 155 | 1009 | 529 | 538 | 751 | 467 | 608 | 352 | 789 | -   | 1143 | 704  | -   | 860  | 1192 | 960  | 834  | 1252 | 985  | 488 | 222 | 136 | -   | 511 | 218 | -   | 515 |     |   |
| V                    | 776      | 664  | 743 | 243  | -   | 803  | -    | 1196 | 622 | 700 | -   | 311 | 360 | 149 | 870  | 425 | 737 | 709 | 570 | 660 | 389 | 795 | 411 | -    | 568  | 586 | 963  | 735  | -    | 841  | 1177 | 1605 | 511 | 345 | 167 | 195 | 223 | 122 | 315 | 526 |     |   |
| A                    | 988      | 765  | 740 | 316  | 956 | 931  | 838  | 1292 | 658 | 611 | 142 | 281 | 428 | 175 | 1054 | 547 | -   | 846 | 537 | 676 | 331 | 666 | 270 | 1152 | 740  | 494 | 983  | 785  | 1136 | 911  | 1265 | 1648 | 482 | 266 | 201 | 160 | 267 | 177 | 201 | 538 |     |   |
| G                    | 614      | -    | 655 | 249  | 762 | 915  | 790  | -    | 673 | 518 | 128 | 265 | 331 | 211 | 880  | 473 | 674 | 690 | 629 | 757 | 386 | -   | 320 | 1132 | 550  | 369 | 901  | 881  | 1182 | 822  | 1265 | 1245 | 472 | 184 | 223 | 241 | 194 | 116 | 251 | 464 |     |   |
| C                    | 839      | 1133 | 792 | 346  | 799 | 1032 | 797  | 944  | 673 | 550 | 100 | 337 | 451 | 217 | 942  | 517 | 573 | 794 | 546 | -   | 513 | 649 | 396 | 1238 | 538  | 421 | 932  | 835  | 1067 | 903  | 1258 | 841  | 495 | 281 | -   | 251 | 221 | 160 | 251 | 474 |     |   |
| S                    | 811      | 1001 | 884 | 352  | 792 | 914  | 793  | 878  | 758 | 486 | 93  | 243 | -   | 260 | 926  | 613 | 916 | 776 | 543 | 760 | 492 | 865 | 319 | 1324 | -    | 362 | 1133 | 721  | 1140 | 931  | 1540 | 893  | 513 | 348 | 190 | 275 | 291 | 197 | 270 | 542 |     |   |
| T                    | 915      | 892  | 882 | 1487 | 749 | 1093 | 794  | 854  | 609 | 469 | 74  | 208 | 530 | 248 | 1051 | -   | 581 | -   | 521 | 657 | 433 | 745 | 314 | 1234 | 532  | 297 | 1139 | 813  | 960  | 755  | 1333 | 608  | 474 | 249 | 146 | 197 | 144 | 166 | 249 | 474 |     |   |
| N                    | 935      | 809  | -   | -    | 747 | 1160 | 841  | 816  | 683 | 384 | 96  | 133 | 480 | -   | 1006 | 548 | 551 | 783 | 580 | 566 | 383 | 775 | 295 | 1170 | 522  | 334 | -    | 931  | 1077 | 845  | 1661 | 603  | 501 | 285 | 139 | 252 | 136 | 166 | 249 | 474 |     |   |
| Q                    | 1125     | 808  | 808 | 320  | 818 | 872  | 739  | 847  | 534 | 567 | 83  | 265 | 481 | 167 | 892  | 512 | 532 | 783 | 549 | 618 | 347 | 722 | 322 | 1086 | 693  | 684 | 1021 | -    | 1061 | 831  | 1292 | 1229 | 381 | 258 | 138 | 301 | -   | 233 | 309 | 494 |     |   |
| D                    | 691      | 988  | 907 | 368  | 768 | 1105 | 958  | 1141 | 665 | 479 | 169 | 230 | 369 | 196 | 953  | 428 | 775 | 767 | 620 | 617 | 344 | 719 | 272 | 1236 | 559  | 328 | 1076 | 796  | 1233 | 865  | 1393 | 1195 | 568 | 411 | 174 | 160 | 186 | 104 | 256 | 460 |     |   |
| E                    | 713      | 701  | 767 | 326  | 940 | 1009 | 836  | 1010 | 613 | 427 | 108 | 196 | 436 | 183 | 944  | 421 | 647 | 781 | 598 | 721 | 431 | 911 | 286 | 1191 | 514  | 330 | 1025 | 741  | 1072 | 878  | 1544 | -    | 479 | 334 | 181 | 201 | 180 | 174 | 224 | 480 |     |   |
| H                    | 905      | 718  | 776 | 393  | 795 | 995  | 866  | 815  | 586 | 479 | 130 | 161 | 481 | 176 | 1060 | 400 | 530 | 710 | 535 | 569 | 478 | 786 | 252 | 1198 | 445  | 520 | 1154 | 1023 | 1065 | 784  | 1097 | 477  | 621 | 316 | 111 | 292 | 419 | 179 | 368 | 413 |     |   |
| K                    | 783      | 786  | 913 | 338  | 750 | 941  | 749  | 799  | 630 | 405 | 96  | 215 | 400 | 218 | 866  | 440 | 577 | 670 | -   | 587 | 416 | 872 | 366 | 1093 | 511  | 283 | 1140 | 752  | 917  | 832  | -    | 572  | 487 | 267 | 115 | 213 | 176 | 137 | 255 | -   |     |   |
| R                    | 848      | 907  | 842 | 380  | 809 | 883  | 807  | 859  | 668 | 459 | 110 | 216 | 502 | 223 | 969  | 540 | 655 | 783 | 501 | 813 | -   | 838 | 277 | 1076 | 641  | 546 | 947  | 1033 | 1125 | 930  | 1429 | 839  | 508 | 260 | 213 | 504 | 353 | 200 | 388 | 498 |     |   |

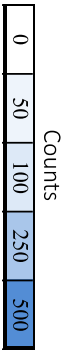

**Supplementary Figure S9: G2 heatmap of mutational frequency represented by number of sequencing read counts “counts”.**



Figure S11: Heatmap of relative frequencies for mutations in the F2T1 fragment. The table displays relative frequencies for 20 mutations (rows, labeled A through R) across 256 positions (columns, labeled A through Z).

| Location | A    | B    | C    | D    | E    | F    | G    | H    | I    | J    | K    | L    | M    | N    | O    | P    | Q    | R    | S    | T    | U    | V    | W    | X    | Y    | Z    |
|----------|------|------|------|------|------|------|------|------|------|------|------|------|------|------|------|------|------|------|------|------|------|------|------|------|------|------|
| A        | 0.12 | 0.13 | 0.14 | 0.15 | 0.16 | 0.17 | 0.18 | 0.19 | 0.20 | 0.21 | 0.22 | 0.23 | 0.24 | 0.25 | 0.26 | 0.27 | 0.28 | 0.29 | 0.30 | 0.31 | 0.32 | 0.33 | 0.34 | 0.35 | 0.36 | 0.37 |
| B        | 0.13 | 0.14 | 0.15 | 0.16 | 0.17 | 0.18 | 0.19 | 0.20 | 0.21 | 0.22 | 0.23 | 0.24 | 0.25 | 0.26 | 0.27 | 0.28 | 0.29 | 0.30 | 0.31 | 0.32 | 0.33 | 0.34 | 0.35 | 0.36 | 0.37 | 0.38 |
| C        | 0.14 | 0.15 | 0.16 | 0.17 | 0.18 | 0.19 | 0.20 | 0.21 | 0.22 | 0.23 | 0.24 | 0.25 | 0.26 | 0.27 | 0.28 | 0.29 | 0.30 | 0.31 | 0.32 | 0.33 | 0.34 | 0.35 | 0.36 | 0.37 | 0.38 | 0.39 |
| D        | 0.15 | 0.16 | 0.17 | 0.18 | 0.19 | 0.20 | 0.21 | 0.22 | 0.23 | 0.24 | 0.25 | 0.26 | 0.27 | 0.28 | 0.29 | 0.30 | 0.31 | 0.32 | 0.33 | 0.34 | 0.35 | 0.36 | 0.37 | 0.38 | 0.39 | 0.40 |
| E        | 0.16 | 0.17 | 0.18 | 0.19 | 0.20 | 0.21 | 0.22 | 0.23 | 0.24 | 0.25 | 0.26 | 0.27 | 0.28 | 0.29 | 0.30 | 0.31 | 0.32 | 0.33 | 0.34 | 0.35 | 0.36 | 0.37 | 0.38 | 0.39 | 0.40 | 0.41 |
| F        | 0.17 | 0.18 | 0.19 | 0.20 | 0.21 | 0.22 | 0.23 | 0.24 | 0.25 | 0.26 | 0.27 | 0.28 | 0.29 | 0.30 | 0.31 | 0.32 | 0.33 | 0.34 | 0.35 | 0.36 | 0.37 | 0.38 | 0.39 | 0.40 | 0.41 | 0.42 |
| G        | 0.18 | 0.19 | 0.20 | 0.21 | 0.22 | 0.23 | 0.24 | 0.25 | 0.26 | 0.27 | 0.28 | 0.29 | 0.30 | 0.31 | 0.32 | 0.33 | 0.34 | 0.35 | 0.36 | 0.37 | 0.38 | 0.39 | 0.40 | 0.41 | 0.42 | 0.43 |
| H        | 0.19 | 0.20 | 0.21 | 0.22 | 0.23 | 0.24 | 0.25 | 0.26 | 0.27 | 0.28 | 0.29 | 0.30 | 0.31 | 0.32 | 0.33 | 0.34 | 0.35 | 0.36 | 0.37 | 0.38 | 0.39 | 0.40 | 0.41 | 0.42 | 0.43 | 0.44 |
| I        | 0.20 | 0.21 | 0.22 | 0.23 | 0.24 | 0.25 | 0.26 | 0.27 | 0.28 | 0.29 | 0.30 | 0.31 | 0.32 | 0.33 | 0.34 | 0.35 | 0.36 | 0.37 | 0.38 | 0.39 | 0.40 | 0.41 | 0.42 | 0.43 | 0.44 | 0.45 |
| J        | 0.21 | 0.22 | 0.23 | 0.24 | 0.25 | 0.26 | 0.27 | 0.28 | 0.29 | 0.30 | 0.31 | 0.32 | 0.33 | 0.34 | 0.35 | 0.36 | 0.37 | 0.38 | 0.39 | 0.40 | 0.41 | 0.42 | 0.43 | 0.44 | 0.45 | 0.46 |
| K        | 0.22 | 0.23 | 0.24 | 0.25 | 0.26 | 0.27 | 0.28 | 0.29 | 0.30 | 0.31 | 0.32 | 0.33 | 0.34 | 0.35 | 0.36 | 0.37 | 0.38 | 0.39 | 0.40 | 0.41 | 0.42 | 0.43 | 0.44 | 0.45 | 0.46 | 0.47 |
| L        | 0.23 | 0.24 | 0.25 | 0.26 | 0.27 | 0.28 | 0.29 | 0.30 | 0.31 | 0.32 | 0.33 | 0.34 | 0.35 | 0.36 | 0.37 | 0.38 | 0.39 | 0.40 | 0.41 | 0.42 | 0.43 | 0.44 | 0.45 | 0.46 | 0.47 | 0.48 |
| M        | 0.24 | 0.25 | 0.26 | 0.27 | 0.28 | 0.29 | 0.30 | 0.31 | 0.32 | 0.33 | 0.34 | 0.35 | 0.36 | 0.37 | 0.38 | 0.39 | 0.40 | 0.41 | 0.42 | 0.43 | 0.44 | 0.45 | 0.46 | 0.47 | 0.48 | 0.49 |
| N        | 0.25 | 0.26 | 0.27 | 0.28 | 0.29 | 0.30 | 0.31 | 0.32 | 0.33 | 0.34 | 0.35 | 0.36 | 0.37 | 0.38 | 0.39 | 0.40 | 0.41 | 0.42 | 0.43 | 0.44 | 0.45 | 0.46 | 0.47 | 0.48 | 0.49 | 0.50 |
| O        | 0.26 | 0.27 | 0.28 | 0.29 | 0.30 | 0.31 | 0.32 | 0.33 | 0.34 | 0.35 | 0.36 | 0.37 | 0.38 | 0.39 | 0.40 | 0.41 | 0.42 | 0.43 | 0.44 | 0.45 | 0.46 | 0.47 | 0.48 | 0.49 | 0.50 | 0.51 |
| P        | 0.27 | 0.28 | 0.29 | 0.30 | 0.31 | 0.32 | 0.33 | 0.34 | 0.35 | 0.36 | 0.37 | 0.38 | 0.39 | 0.40 | 0.41 | 0.42 | 0.43 | 0.44 | 0.45 | 0.46 | 0.47 | 0.48 | 0.49 | 0.50 | 0.51 | 0.52 |
| Q        | 0.28 | 0.29 | 0.30 | 0.31 | 0.32 | 0.33 | 0.34 | 0.35 | 0.36 | 0.37 | 0.38 | 0.39 | 0.40 | 0.41 | 0.42 | 0.43 | 0.44 | 0.45 | 0.46 | 0.47 | 0.48 | 0.49 | 0.50 | 0.51 | 0.52 | 0.53 |
| R        | 0.29 | 0.30 | 0.31 | 0.32 | 0.33 | 0.34 | 0.35 | 0.36 | 0.37 | 0.38 | 0.39 | 0.40 | 0.41 | 0.42 | 0.43 | 0.44 | 0.45 | 0.46 | 0.47 | 0.48 | 0.49 | 0.50 | 0.51 | 0.52 | 0.53 | 0.54 |
| S        | 0.30 | 0.31 | 0.32 | 0.33 | 0.34 | 0.35 | 0.36 | 0.37 | 0.38 | 0.39 | 0.40 | 0.41 | 0.42 | 0.43 | 0.44 | 0.45 | 0.46 | 0.47 | 0.48 | 0.49 | 0.50 | 0.51 | 0.52 | 0.53 | 0.54 | 0.55 |
| T        | 0.31 | 0.32 | 0.33 | 0.34 | 0.35 | 0.36 | 0.37 | 0.38 | 0.39 | 0.40 | 0.41 | 0.42 | 0.43 | 0.44 | 0.45 | 0.46 | 0.47 | 0.48 | 0.49 | 0.50 | 0.51 | 0.52 | 0.53 | 0.54 | 0.55 | 0.56 |
| U        | 0.32 | 0.33 | 0.34 | 0.35 | 0.36 | 0.37 | 0.38 | 0.39 | 0.40 | 0.41 | 0.42 | 0.43 | 0.44 | 0.45 | 0.46 | 0.47 | 0.48 | 0.49 | 0.50 | 0.51 | 0.52 | 0.53 | 0.54 | 0.55 | 0.56 | 0.57 |
| V        | 0.33 | 0.34 | 0.35 | 0.36 | 0.37 | 0.38 | 0.39 | 0.40 | 0.41 | 0.42 | 0.43 | 0.44 | 0.45 | 0.46 | 0.47 | 0.48 | 0.49 | 0.50 | 0.51 | 0.52 | 0.53 | 0.54 | 0.55 | 0.56 | 0.57 | 0.58 |
| W        | 0.34 | 0.35 | 0.36 | 0.37 | 0.38 | 0.39 | 0.40 | 0.41 | 0.42 | 0.43 | 0.44 | 0.45 | 0.46 | 0.47 | 0.48 | 0.49 | 0.50 | 0.51 | 0.52 | 0.53 | 0.54 | 0.55 | 0.56 | 0.57 | 0.58 | 0.59 |
| X        | 0.35 | 0.36 | 0.37 | 0.38 | 0.39 | 0.40 | 0.41 | 0.42 | 0.43 | 0.44 | 0.45 | 0.46 | 0.47 | 0.48 | 0.49 | 0.50 | 0.51 | 0.52 | 0.53 | 0.54 | 0.55 | 0.56 | 0.57 | 0.58 | 0.59 | 0.60 |
| Y        | 0.36 | 0.37 | 0.38 | 0.39 | 0.40 | 0.41 | 0.42 | 0.43 | 0.44 | 0.45 | 0.46 | 0.47 | 0.48 | 0.49 | 0.50 | 0.51 | 0.52 | 0.53 | 0.54 | 0.55 | 0.56 | 0.57 | 0.58 | 0.59 | 0.60 | 0.61 |
| Z        | 0.37 | 0.38 | 0.39 | 0.40 | 0.41 | 0.42 | 0.43 | 0.44 | 0.45 | 0.46 | 0.47 | 0.48 | 0.49 | 0.50 | 0.51 | 0.52 | 0.53 | 0.54 | 0.55 | 0.56 | 0.57 | 0.58 | 0.59 | 0.60 | 0.61 | 0.62 |

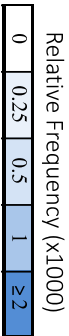

Supplementary Figure S11: Heatmap of relative frequencies for mutations in the F2T1 fragment.







| Position | 3    | 4    | 5    | 6    | 7    | 8    | 9    | 10   | 11   | 12   | 13   | 14   | 15   | 16   | 17   | 18   | 19   | 20   | 21   | 22   | 23   | 24   | 25   | 26   | 27   | 28   | 29   | 30   | 31   | 32   | 33   | 34   | 35   | 36   | 37   | 38   | 39   | 40   | 41   | 42   | 43   | 44   | 45   | 46   | 47   | 48   | 49   | 50   | 51   | 52   | 53   |      |
|----------|------|------|------|------|------|------|------|------|------|------|------|------|------|------|------|------|------|------|------|------|------|------|------|------|------|------|------|------|------|------|------|------|------|------|------|------|------|------|------|------|------|------|------|------|------|------|------|------|------|------|------|------|
| A        | 0.19 | 0.43 | 0.04 | 0.80 | 0.27 | 0.16 | 0.32 | 0.07 | 0.11 | 0.51 | 0.23 | 0.58 | 1.08 | 0.17 | 0.34 | 0.23 | 0.61 | 0.60 | 0.64 | 0.19 | 0.46 | 0.57 | 0.70 | 2.53 | 3.04 | 3.53 | 2.45 | 0.63 | 0.30 | 0.92 | 0.73 | 1.45 | 2.13 | 1.53 | 0.90 | 1.56 | 0.67 | 1.05 | 0.33 | 0.40 | 0.84 | 1.16 | 2.10 | 1.15 | 1.49 | 0.90 | 0.16 | 0.19 | 0.17 | 0.21 | 0.18 | 0.42 |
| C        | 0.17 | 0.21 | 0.07 | 1.10 | 0.23 | 0.31 | 0.10 | 0.10 | 0.22 | 0.52 | 0.60 | 0.88 | 0.93 | 0.49 | 0.42 | 0.07 | 0.24 | 0.66 | 0.61 | 0.39 | 0.61 | 0.59 | 0.38 | 1.25 | 1.42 | 1.70 | 2.03 | 1.04 | 0.38 | 1.83 | 1.74 | 1.80 | 1.52 | 1.76 | 1.27 | 1.47 | 0.83 | 0.86 | 0.56 | 0.31 | 0.69 | 1.59 | 1.10 | 1.34 | 0.61 | 0.04 | 0.11 | 0.13 | 0.18 | 0.14 | 0.19 |      |
| G        | 0.17 | 0.21 | 0.07 | 1.10 | 0.23 | 0.31 | 0.10 | 0.10 | 0.22 | 0.52 | 0.60 | 0.88 | 0.93 | 0.49 | 0.42 | 0.07 | 0.24 | 0.66 | 0.61 | 0.39 | 0.61 | 0.59 | 0.38 | 1.25 | 1.42 | 1.70 | 2.03 | 1.04 | 0.38 | 1.83 | 1.74 | 1.80 | 1.52 | 1.76 | 1.27 | 1.47 | 0.83 | 0.86 | 0.56 | 0.31 | 0.69 | 1.59 | 1.10 | 1.34 | 0.61 | 0.04 | 0.11 | 0.13 | 0.18 | 0.14 | 0.19 |      |
| T        | 0.17 | 0.21 | 0.07 | 1.10 | 0.23 | 0.31 | 0.10 | 0.10 | 0.22 | 0.52 | 0.60 | 0.88 | 0.93 | 0.49 | 0.42 | 0.07 | 0.24 | 0.66 | 0.61 | 0.39 | 0.61 | 0.59 | 0.38 | 1.25 | 1.42 | 1.70 | 2.03 | 1.04 | 0.38 | 1.83 | 1.74 | 1.80 | 1.52 | 1.76 | 1.27 | 1.47 | 0.83 | 0.86 | 0.56 | 0.31 | 0.69 | 1.59 | 1.10 | 1.34 | 0.61 | 0.04 | 0.11 | 0.13 | 0.18 | 0.14 | 0.19 |      |
| U        | 0.17 | 0.21 | 0.07 | 1.10 | 0.23 | 0.31 | 0.10 | 0.10 | 0.22 | 0.52 | 0.60 | 0.88 | 0.93 | 0.49 | 0.42 | 0.07 | 0.24 | 0.66 | 0.61 | 0.39 | 0.61 | 0.59 | 0.38 | 1.25 | 1.42 | 1.70 | 2.03 | 1.04 | 0.38 | 1.83 | 1.74 | 1.80 | 1.52 | 1.76 | 1.27 | 1.47 | 0.83 | 0.86 | 0.56 | 0.31 | 0.69 | 1.59 | 1.10 | 1.34 | 0.61 | 0.04 | 0.11 | 0.13 | 0.18 | 0.14 | 0.19 |      |
| V        | 0.17 | 0.21 | 0.07 | 1.10 | 0.23 | 0.31 | 0.10 | 0.10 | 0.22 | 0.52 | 0.60 | 0.88 | 0.93 | 0.49 | 0.42 | 0.07 | 0.24 | 0.66 | 0.61 | 0.39 | 0.61 | 0.59 | 0.38 | 1.25 | 1.42 | 1.70 | 2.03 | 1.04 | 0.38 | 1.83 | 1.74 | 1.80 | 1.52 | 1.76 | 1.27 | 1.47 | 0.83 | 0.86 | 0.56 | 0.31 | 0.69 | 1.59 | 1.10 | 1.34 | 0.61 | 0.04 | 0.11 | 0.13 | 0.18 | 0.14 | 0.19 |      |
| W        | 0.17 | 0.21 | 0.07 | 1.10 | 0.23 | 0.31 | 0.10 | 0.10 | 0.22 | 0.52 | 0.60 | 0.88 | 0.93 | 0.49 | 0.42 | 0.07 | 0.24 | 0.66 | 0.61 | 0.39 | 0.61 | 0.59 | 0.38 | 1.25 | 1.42 | 1.70 | 2.03 | 1.04 | 0.38 | 1.83 | 1.74 | 1.80 | 1.52 | 1.76 | 1.27 | 1.47 | 0.83 | 0.86 | 0.56 | 0.31 | 0.69 | 1.59 | 1.10 | 1.34 | 0.61 | 0.04 | 0.11 | 0.13 | 0.18 | 0.14 | 0.19 |      |
| X        | 0.17 | 0.21 | 0.07 | 1.10 | 0.23 | 0.31 | 0.10 | 0.10 | 0.22 | 0.52 | 0.60 | 0.88 | 0.93 | 0.49 | 0.42 | 0.07 | 0.24 | 0.66 | 0.61 | 0.39 | 0.61 | 0.59 | 0.38 | 1.25 | 1.42 | 1.70 | 2.03 | 1.04 | 0.38 | 1.83 | 1.74 | 1.80 | 1.52 | 1.76 | 1.27 | 1.47 | 0.83 | 0.86 | 0.56 | 0.31 | 0.69 | 1.59 | 1.10 | 1.34 | 0.61 | 0.04 | 0.11 | 0.13 | 0.18 | 0.14 | 0.19 |      |
| Y        | 0.17 | 0.21 | 0.07 | 1.10 | 0.23 | 0.31 | 0.10 | 0.10 | 0.22 | 0.52 | 0.60 | 0.88 | 0.93 | 0.49 | 0.42 | 0.07 | 0.24 | 0.66 | 0.61 | 0.39 | 0.61 | 0.59 | 0.38 | 1.25 | 1.42 | 1.70 | 2.03 | 1.04 | 0.38 | 1.83 | 1.74 | 1.80 | 1.52 | 1.76 | 1.27 | 1.47 | 0.83 | 0.86 | 0.56 | 0.31 | 0.69 | 1.59 | 1.10 | 1.34 | 0.61 | 0.04 | 0.11 | 0.13 | 0.18 | 0.14 | 0.19 |      |
| Z        | 0.17 | 0.21 | 0.07 | 1.10 | 0.23 | 0.31 | 0.10 | 0.10 | 0.22 | 0.52 | 0.60 | 0.88 | 0.93 | 0.49 | 0.42 | 0.07 | 0.24 | 0.66 | 0.61 | 0.39 | 0.61 | 0.59 | 0.38 | 1.25 | 1.42 | 1.70 | 2.03 | 1.04 | 0.38 | 1.83 | 1.74 | 1.80 | 1.52 | 1.76 | 1.27 | 1.47 | 0.83 | 0.86 | 0.56 | 0.31 | 0.69 | 1.59 | 1.10 | 1.34 | 0.61 | 0.04 | 0.11 | 0.13 | 0.18 | 0.14 | 0.19 |      |

Relative Frequency (x1000)

0    0.25    0.5    1    ≥2

Supplementary Figure S15: Heatmap of relative frequencies for mutations in the G1T1 fragment.





| G2 heatmap of counts |   | 136  | 137  | 138  | 139  | 140  | 141  | 142  | 143  | 144  | 145  | 146  | 147  | 148  | 149  | 150  | 151  | 152  | 153  | 154  | 155  | 156  | 157  | 158  | 159  | 160  | 161  | 162  | 163  | 164  | 165  | 166  | 167  | 168  | 169  | 170  | 171  | 172  | 173  | 174  | 175  |      |      |      |
|----------------------|---|------|------|------|------|------|------|------|------|------|------|------|------|------|------|------|------|------|------|------|------|------|------|------|------|------|------|------|------|------|------|------|------|------|------|------|------|------|------|------|------|------|------|------|
| Location             | P | 136  | 137  | 138  | 139  | 140  | 141  | 142  | 143  | 144  | 145  | 146  | 147  | 148  | 149  | 150  | 151  | 152  | 153  | 154  | 155  | 156  | 157  | 158  | 159  | 160  | 161  | 162  | 163  | 164  | 165  | 166  | 167  | 168  | 169  | 170  | 171  | 172  | 173  | 174  | 175  |      |      |      |
| Mutation             | G | 1.28 | 1.13 | 1.01 | 0.50 | 1.21 | 2.06 | 1.58 | 1.59 | -    | 0.77 | 0.30 | 0.37 | 0.98 | 0.52 | -    | 0.78 | 0.91 | 1.47 | 0.87 | 1.23 | 1.33 | 1.34 | 1.45 | 0.80 | 1.74 | 0.74 | 2.42 | 1.00 | 0.94 | 1.81 | 1.56 | 2.02 | 1.71 | 3.00 | 1.19 | 0.94 | 0.48 | 0.35 | 0.36 | 0.49 | 0.34 | 0.52 | 1.08 |
|                      | N | 1.49 | 1.46 | 1.26 | 0.57 | 1.62 | 1.92 | 1.44 | 2.27 | 1.22 | 1.05 | 0.18 | -    | 0.73 | 0.28 | -    | 0.81 | 1.19 | 1.44 | 1.40 | 1.14 | 1.37 | 0.79 | 1.33 | 0.67 | 1.75 | 1.24 | 0.92 | 1.75 | 1.87 | 1.74 | 1.42 | 2.52 | 2.18 | 0.79 | 0.44 | 1.08 | 0.32 | 0.38 | 0.23 | 0.51 | 0.60 | 0.80 |      |
|                      | V | 1.51 | 1.24 | 1.84 | 0.78 | 1.48 | -    | 1.65 | 1.38 | 1.14 | 0.88 | 0.22 | 0.44 | 1.02 | 0.56 | 2.03 | 0.90 | 1.16 | 1.40 | 1.14 | 1.37 | 0.79 | 1.31 | 0.67 | 2.25 | 1.11 | 0.64 | 2.31 | 1.36 | 2.16 | 1.56 | 2.51 | 0.84 | 1.10 | 0.88 | 0.42 | 0.29 | 0.25 | 0.31 | 0.54 | 0.76 | 0.85 |      |      |
|                      | P | -    | 1.56 | 1.42 | 0.57 | 1.60 | 1.82 | 1.60 | 1.95 | 1.53 | 1.78 | 1.12 | -    | 0.22 | 0.53 | 0.82 | 0.38 | 2.06 | 0.80 | 1.08 | 1.20 | 1.29 | 1.43 | 0.73 | 1.45 | 0.57 | 2.51 | 0.92 | 0.80 | 2.26 | 1.37 | 2.40 | 2.14 | 1.72 | 1.17 | 0.34 | 0.44 | 0.60 | 0.33 | 0.53 | 1.09 | 0.60 | 1.07 |      |
|                      | M | 1.81 | 1.44 | 1.84 | 0.52 | 1.58 | 1.95 | 1.69 | 1.96 | 1.26 | 1.06 | 0.19 | 0.60 | 1.17 | 0.38 | 1.99 | 1.02 | 1.12 | 1.22 | 1.22 | 1.14 | 1.16 | 0.71 | 1.36 | 0.57 | 2.51 | 0.92 | 0.80 | 2.26 | 1.37 | 2.40 | 2.14 | 1.72 | 1.17 | 0.34 | 0.44 | 0.60 | 0.33 | 0.53 | 1.09 | 0.60 | 1.07 |      |      |
|                      | I | 1.47 | 1.33 | 1.70 | 0.94 | 1.49 | 2.00 | 1.71 | 1.55 | 1.13 | 1.26 | 0.33 | 0.37 | 0.83 | 0.29 | 2.21 | 1.12 | 1.22 | 1.22 | 1.14 | 1.16 | 0.71 | 1.36 | 0.57 | 2.51 | 0.92 | 0.80 | 2.26 | 1.37 | 2.40 | 2.14 | 1.72 | 1.17 | 0.34 | 0.44 | 0.60 | 0.33 | 0.53 | 1.09 | 0.60 | 1.07 |      |      |      |
|                      | L | 1.87 | 1.59 | 1.49 | 0.74 | 1.40 | 1.98 | 1.55 | 1.73 | 1.32 | 1.38 | 0.21 | 0.50 | 0.96 | 0.32 | 2.08 | 1.09 | 1.11 | 1.55 | 0.96 | 1.25 | 0.73 | 1.63 | -    | 2.35 | 1.45 | -    | 1.77 | 2.46 | 1.98 | 1.72 | 2.58 | 2.03 | 1.01 | 0.46 | 0.28 | -    | 1.05 | 0.45 | -    | 1.06 |      |      |      |
|                      | V | 1.60 | 1.37 | 1.53 | 0.50 | -    | 1.65 | -    | 2.46 | 1.28 | 1.44 | -    | 0.64 | 0.74 | 0.31 | 1.79 | 0.88 | 1.32 | 1.24 | 1.11 | 1.39 | 0.68 | 1.37 | 0.56 | 2.37 | 1.52 | 1.02 | 2.03 | 1.62 | 2.34 | 1.88 | 2.61 | 3.39 | 0.99 | 0.53 | 0.41 | 0.33 | 0.55 | 0.56 | 0.41 | 1.11 |      |      |      |
|                      | A | 2.04 | 1.57 | 1.52 | 0.65 | 1.97 | 1.92 | 1.73 | 2.66 | 1.36 | 1.26 | 0.29 | 0.58 | 0.88 | 0.36 | 2.17 | 1.13 | -    | 1.74 | 1.11 | 1.59 | 0.68 | 1.37 | 0.56 | 2.37 | 1.52 | 1.02 | 2.03 | 1.62 | 2.34 | 1.88 | 2.61 | 3.39 | 0.99 | 0.53 | 0.41 | 0.33 | 0.55 | 0.56 | 0.41 | 1.11 |      |      |      |
|                      | G | 1.26 | -    | 1.35 | 0.51 | 1.57 | 1.88 | 1.63 | -    | 1.39 | 1.07 | 0.26 | 0.55 | 0.68 | 0.43 | 1.81 | 0.97 | 1.39 | 1.42 | 1.30 | 1.56 | 0.80 | -    | 0.66 | 2.33 | 1.13 | 0.76 | 1.86 | 1.81 | 2.43 | 1.69 | 2.61 | 2.56 | 0.97 | 0.38 | 0.46 | 0.50 | 0.40 | 0.24 | 0.53 | 0.96 |      |      |      |
|                      | C | 1.73 | 2.33 | 1.63 | 0.71 | 1.65 | 2.13 | 1.64 | 1.94 | -    | 1.39 | 1.13 | 0.21 | 0.69 | 0.93 | 0.45 | 1.94 | 1.07 | 1.18 | 1.64 | 1.12 | -    | 1.06 | 1.34 | 0.82 | 2.25 | -    | 0.75 | 2.33 | 1.49 | 2.35 | 1.92 | 3.17 | 1.84 | 1.06 | 0.72 | 0.39 | 0.57 | 0.60 | 0.41 | 0.56 | 1.12 |      |      |
|                      | S | 1.67 | 3.06 | 1.82 | 0.73 | 1.63 | 1.88 | 1.63 | 1.81 | 1.56 | 1.00 | 0.19 | 0.50 | -    | 0.54 | 1.91 | 1.26 | 1.89 | 1.60 | 1.12 | 1.57 | 1.01 | 1.78 | 0.66 | 2.23 | -    | 0.75 | 2.33 | 1.49 | 2.35 | 1.92 | 3.17 | 1.84 | 1.06 | 0.72 | 0.39 | 0.57 | 0.60 | 0.41 | 0.56 | 1.12 |      |      |      |
|                      | T | 2.09 | 1.84 | 1.82 | 3.06 | 1.54 | 2.25 | 1.64 | 1.76 | 1.44 | 0.97 | 0.13 | 0.43 | 1.09 | 0.51 | 2.17 | -    | 1.20 | -    | 1.07 | 1.31 | 0.89 | 1.53 | 0.65 | 2.54 | 1.10 | 0.61 | 2.35 | 1.67 | 1.98 | 1.56 | 2.75 | 1.25 | 0.98 | 0.51 | 0.30 | 0.41 | 0.30 | 0.34 | 0.53 | 0.97 |      |      |      |
|                      | N | 1.93 | 1.67 | -    | -    | 1.54 | 2.39 | 1.75 | 1.68 | 1.41 | 0.79 | 0.20 | 0.27 | 0.99 | -    | 2.07 | 1.13 | 1.14 | 1.61 | 1.19 | 1.17 | 0.79 | 1.60 | 0.61 | 2.24 | 1.08 | 0.69 | -    | 1.92 | 2.22 | 1.74 | 3.42 | 1.24 | 1.03 | 0.59 | 0.29 | 0.52 | 0.28 | 0.22 | 0.51 | 0.98 |      |      |      |
|                      | Q | 2.52 | 1.66 | 1.66 | 0.66 | 1.69 | 1.80 | 1.52 | 1.74 | 1.10 | 1.17 | 0.17 | 0.35 | 0.99 | 0.34 | 1.84 | 1.05 | 1.10 | 1.62 | 1.13 | 1.27 | 0.71 | 1.49 | 0.66 | 2.24 | 1.48 | 1.41 | 2.10 | -    | 2.19 | 1.71 | 2.66 | 2.55 | 0.78 | 0.53 | 0.28 | 0.62 | -    | 0.48 | 0.64 | 1.02 |      |      |      |
|                      | D | 1.42 | 2.04 | 1.58 | 0.76 | 1.58 | 2.28 | 1.97 | 2.25 | 1.37 | 0.99 | 0.35 | 0.47 | 0.76 | 0.40 | 1.96 | 0.88 | 1.60 | 1.58 | 1.28 | 1.27 | 0.71 | 1.48 | 0.56 | 2.25 | 1.15 | 0.68 | 2.22 | 1.64 | 2.54 | 1.78 | 2.87 | 2.46 | 1.17 | 0.85 | 0.36 | 0.33 | 0.38 | 0.28 | 0.56 | 0.99 | 0.95 |      |      |
|                      | E | 1.47 | 1.44 | 1.60 | 0.81 | 1.94 | 2.08 | 1.72 | 2.08 | 1.26 | 0.88 | 0.22 | 0.40 | 0.90 | 0.38 | 1.94 | 0.87 | 1.33 | 1.61 | 1.23 | 1.49 | 0.89 | 1.88 | 0.59 | 2.45 | 1.06 | 0.68 | 2.11 | 1.53 | 2.21 | 1.81 | 3.18 | -    | 0.99 | 0.69 | 0.37 | 0.41 | 0.37 | 0.56 | 0.46 | 0.99 |      |      |      |
|                      | H | 1.86 | 1.48 | 1.60 | 0.81 | 1.64 | 2.05 | 1.78 | 1.68 | 1.21 | 0.99 | 0.27 | 0.33 | 0.99 | 0.36 | 2.18 | 0.82 | 1.09 | 1.46 | 1.10 | 1.17 | 0.98 | 1.62 | 0.52 | 2.47 | 0.92 | 1.07 | 2.38 | 2.11 | 2.19 | 1.62 | 2.26 | 0.98 | 1.28 | 0.65 | 0.23 | 0.60 | 0.86 | 0.57 | 0.76 | 0.85 |      |      |      |
|                      | K | 1.61 | 1.62 | 1.88 | 0.70 | 1.55 | 1.94 | 1.54 | 1.65 | 1.30 | 0.83 | 0.20 | 0.44 | 0.82 | 0.45 | 1.78 | 0.91 | 1.19 | 1.38 | -    | 1.21 | 0.86 | 1.80 | 0.75 | 2.25 | 1.05 | 0.58 | 2.35 | 1.55 | 1.89 | 1.71 | -    | 1.18 | 1.00 | 0.53 | 0.24 | 0.44 | 0.36 | 0.28 | 0.53 | -    |      |      |      |
|                      | R | 1.75 | 1.87 | 1.73 | 0.78 | 1.67 | 1.82 | 1.66 | 1.77 | 1.38 | 0.95 | 0.23 | 0.44 | 1.03 | 0.46 | 2.00 | 1.11 | 1.35 | 1.61 | 1.03 | 1.67 | -    | 1.73 | 0.57 | 2.22 | 1.32 | 1.12 | 1.95 | 2.13 | 2.32 | 1.92 | 2.94 | -    | 1.18 | 1.00 | 0.54 | 0.44 | 0.44 | 0.73 | 0.41 | 0.80 | 1.03 |      |      |

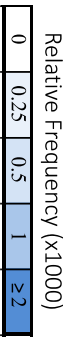

Supplementary Figure S17: Heatmap of relative frequencies for mutations in the G2 fragment.

**Supplementary Figure S18: Agarose gel image showing effectiveness of DNase1 in  $\Phi$ LB.** 25 cycles of PCR were performed after a 1-hour 37°C incubation of WT ligation mix with DNase1. Primer sequences for phix\_2375F and phix\_2949R were 5'-ACACTGACGACATGGTTCTACAAtctgcttaggagtttaac-3' and 5'-TACGGTAGCAGAGACTTGGTCTgcaccaaacataaatcacc-3'. These primers include annealing sequences for Illumina 2<sup>nd</sup> round barcoding primers.

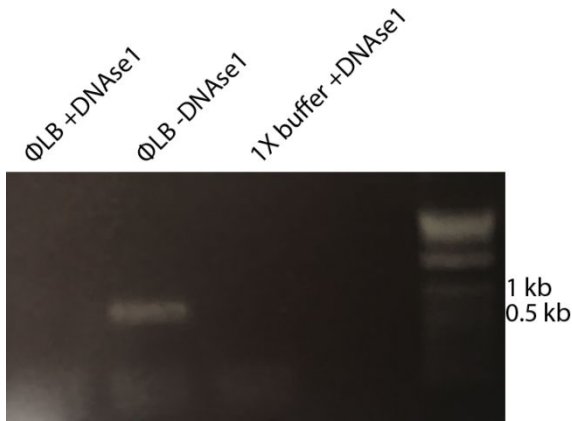

**Supplemental Figure S19. Consistency between transformation replicates.**

Virus titers for four replicate transformations were compared by Anova (global p.adj = 0.006) and pairwise tests with adjusted p-values (Wilcoxon) shown on the plot. These experiments were done using 1 uL of transformation mix, as arcing occasionally occurs with 4 uL. The G1/G2 construct is the result of ligating together the G1 and G2 libraries.

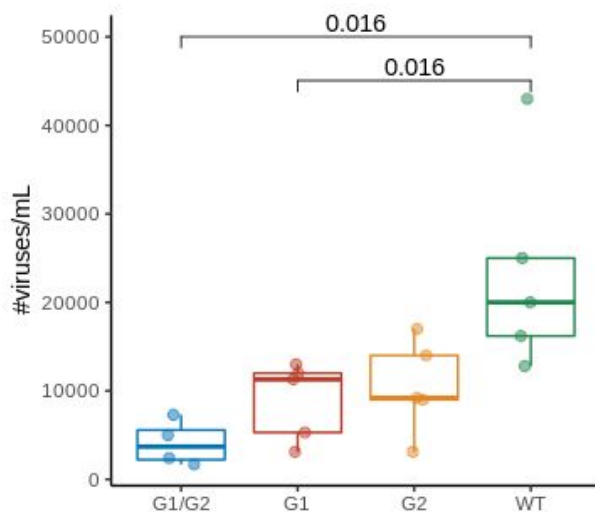

**Supplemental table S1. Primers for incorporating BbvCI nicking sites into the pCR2.1-topo shuttle vector.** Blue text is the overlap region with the shuttle vector, red is the KpnI site, green is the BbvCI site.

|                                             |
|---------------------------------------------|
| Nick_incorporation_fwd                      |
| GCTCTACGGGTACCGCTGAGGGAGCTCGGATCCACTAGTAACG |
| Nick_incorporation_rvs                      |
| GCTCTAACGGGTACCAAGCTTGGCGTAATCATGGTC        |

**Supplemental table S2. Inner and outer primers for PCR reactions for Illumina sequencing.** Red indicates overhang regions for attaching Illumina adapter primers (inner PCR primers) or overhangs for attaching to inner PCR product (outer PCR primers), black is the overlap region in the gene or the barcode, blue is the Illumina adapter.

| Inner PCR Primers                               | Sequence (5' to 3')                                           |
|-------------------------------------------------|---------------------------------------------------------------|
| Fragment F1 Fwd                                 | gttcagagtctacagtcgacgaacccttactgaggataaatt                    |
| Fragment F2 Tile 1 Fwd                          | gttcagagtctacagtcgacgatcactcactatagggcgaa                     |
| Fragment F2 Tile 2 Fwd                          | gttcagagtctacagtcgacgatcagcttaatacaagatgatgct                 |
| Fragment F3 Tile 1 Fwd                          | gttcagagtctacagtcgacgatcgtctctctgggca                         |
| Fragment F3 Tile 2 Fwd                          | gttcagagtctacagtcgacgatcgaaggatgtttccgt                       |
| Fragment G1 Tile 1 Fwd                          | gttcagagtctacagtcgacgatcgaattggccctctag                       |
| Fragment G1 Tile 2 Fwd                          | gttcagagtctacagtcgacgatcggtaatgctgtaatgg                      |
| Fragment G2 Fwd                                 | gttcagagtctacagtcgacgatcggccctctagatgca                       |
| Fragment F1 Rvs                                 | ccttggcaccgagaattccattcgtctcacagtcgg                          |
| Fragment F2 Tile 1 Rvs                          | ccttggcaccgagaattccacaacggaaaccataacg                         |
| sdFragment F2 Tile 2 Rvs                        | ccttggcaccgagaattccattcgtctcccagag                            |
| Fragment F3 Tile 1 Rvs                          | ccttggcaccgagaattccattcttagacgaatcaccaga                      |
| Fragment F3 Tile 2 Rvs                          | ccttggcaccgagaattccatcacactcaatctttatca                       |
| Fragment G1 Tile 1 Rvs                          | ccttggcaccgagaattccatgcaatgaagaaaacca                         |
| Fragment G1 Tile 2 Rvs                          | ccttggcaccgagaattccacttcgtctccgtacg                           |
| Fragment G2 Rvs                                 | ccttggcaccgagaattccattgaccgcctcca                             |
| <b>Illumina outer primer adapter</b>            | aatgatacggcgaccaccgagatctacacgttcagagtctacagtcgga             |
| <b>Illumina outer PCR adapters and barcodes</b> |                                                               |
| RPI31 (Fragment F1)                             | caagcagaagacggcatacagatATCGTGgtgactggagttccttggcaccgagaattcca |
| RPI15 (Fragment F2 Tile 1)                      | caagcagaagacggcatacagatTGACATgtgactggagttccttggcaccgagaattcca |
| RPI16 (Fragment F2 Tile 2)                      | caagcagaagacggcatacagatGGACGGgtgactggagttccttggcaccgagaattcca |
| RPI17 (Fragment F3 Tile 1)                      | caagcagaagacggcatacagatCTCTACgtgactggagttccttggcaccgagaattcca |
| RPI18 (Fragment F3 Tile 2)                      | caagcagaagacggcatacagatGCGGACgtgactggagttccttggcaccgagaattcca |
| RPI19 (Fragment G1 Tile 1)                      | caagcagaagacggcatacagatTTTCACgtgactggagttccttggcaccgagaattcca |
| RPI20 (Fragment G1 Tile 2)                      | caagcagaagacggcatacagatGGCCACgtgactggagttccttggcaccgagaattcca |
| RPI21 (Fragment G2)                             | caagcagaagacggcatacagatCGAAACgtgactggagttccttggcaccgagaattcca |

**Supplemental Table S3. Mutant library preparation summary.** Summary table of the transformants required for sufficient library coverage, transformants obtained during comprehensive mutant library preparation by nicking scanning mutagenesis, and the fold excess of the number of transformants required for coverage.

|                                                               |         |         |         |         |         |
|---------------------------------------------------------------|---------|---------|---------|---------|---------|
| Gene mutated                                                  | F1      | F2      | F3      | G1      | G2      |
| Number of Residues                                            | 95      | 144     | 182     | 132     | 40      |
| Transformants obtained following NSM                          | 620,000 | 890,000 | 370,000 | 620,000 | 640,000 |
| Required transformants for 99.9% coverage of possible library | 13781   | 20889   | 26401   | 19148   | 5803    |
| Fold excess over amount required for coverage                 | 45      | 43      | 14      | 32      | 110     |

**Supplementary Table S4. Mutant plasmid library NGS statistics.** Summary table of the libraries prior to viral genome assembly. Long fragments required separate amplicon sequencing reactions as shown.

| Fragment                                            | F1      |        | F2      |         | F3      |        | G1     |         | G2 |
|-----------------------------------------------------|---------|--------|---------|---------|---------|--------|--------|---------|----|
| Tile Number                                         | 1       | 1      | 2       | 1       | 2       | 1      | 2      | 1       |    |
| Residues                                            | 1-95    | 99-157 | 158-242 | 246-336 | 337-427 | 2-53   | 55-133 | 136-175 |    |
| Sequencing reads post quality filter                | 1163959 | 681935 | 1714460 | 800377  | 757177  | 747800 | 969275 | 813221  |    |
| Fold oversampling of codon combinations             | 441.1   | 499.8  | 851     | 364.8   | 345.1   | 632.8  | 517.6  | 821.9   |    |
| Percent of reads with:                              |         |        |         |         |         |        |        |         |    |
| No nonsynonymous mutations                          | 23.0%   | 63.3%  | 52.3%   | 54.0%   | 55.0%   | 68.3%  | 48.8%  | 25.2%   |    |
| One nonsynonymous mutation                          | 52.6%   | 27.5%  | 36.3%   | 33.1%   | 32.1%   | 24.1%  | 39.8%  | 59.7%   |    |
| Multiple nonsynonymous mutation                     | 24.4%   | 9.2%   | 11.3%   | 12.9%   | 12.8%   | 7.6%   | 11.4%  | 15.1%   |    |
| Coverage of possible single nonsynonymous mutations | 100%    | 100%   | 99.8%   | 100%    | 99.9%   | 99.6%  | 100%   | 100%    |    |

**Supplemental Table S5. Viral growth rate during transformation cell recovery.**

Viral titers immediately after transformation (0 min) and then for every 30 min after up to 2 hours. As the XL1-Blue cells are not susceptible, the increase in titer is the result of cell bursts, which releases viable phage. While the virus is replicating for the first 30 minutes, they are all held within a cell and will only make one plaque.

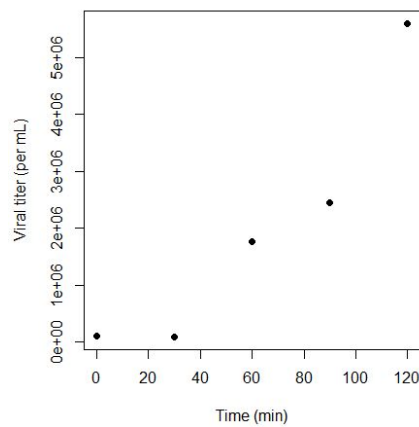

| Time (min) | Dilution | #Plaques | Titer (viruses/mL) |
|------------|----------|----------|--------------------|
| 0          | 1E-3     | 101      | 101,000            |
| 30         | 1E-3     | 90       | 90,000             |
| 60         | 1E-4     | 177      | 1,770,000          |
| 90         | 1E-4     | 245      | 2,450,000          |
| 120        | 1E-5     | 56       | 5,600,000          |

**Supplemental Table S6. List of observed mutations in plaque sequencing.**

Residues where more than one substitution was observed are bolded. Residues where mutations have been observed in previous studies (but not the exact substitution) are indicated\*.

| Fragment | Mutations                                                                                         |
|----------|---------------------------------------------------------------------------------------------------|
| G1       | L20T, S28I, Q33N, <b>T34N</b> , <b>T34I</b> , A37S, <b>S46M</b> , <b>S46C</b> , A51L, T64D, A69P, |

|    |                                                                                                                                                                      |
|----|----------------------------------------------------------------------------------------------------------------------------------------------------------------------|
|    | V75C, A83S, F87Q, C90Q, S97F, T102M, L103V, <b>A106C*</b> , <b>A106Q*</b> , T122G, V127N                                                                             |
| G2 | T151G, A152F, T153L, K154A, <b>R156L</b> , <b>R156M</b>                                                                                                              |
| F1 | H13M, <b>D14H</b> , <b>D14Q</b> , L15C, S16E, I29G*, M44Q, D45Q*, L52M, F68V, G79A, K84V*, D88M, <b>N91T</b> , <b>N91Y</b> , <b>T93E</b> , <b>T93L</b> , <b>T93Y</b> |
| F2 | N134K, T145R, E146D, P149V, E177W, S181N, Q183P, T185S*, L196M, H204I*, T205D*, Y211H, S222E, N233R                                                                  |
| F3 | D254S, A296Y, N304H, G307S, <b>A308Q</b> , <b>A308Q</b> , G316A, L320T, K342V, Y354Q, E374C, S377Q, G378Y, Q393T*                                                    |

**Supplemental Table S7. Testing for the optimal amount of ligation mix to transform.** Different amounts and dilutions of wildtype ligation mix were transformed into XL1-Blue cells to test for effects of DNA and salt concentration on transformation efficiency. The most transformants results from transforming 4 uL of ligated fragments.

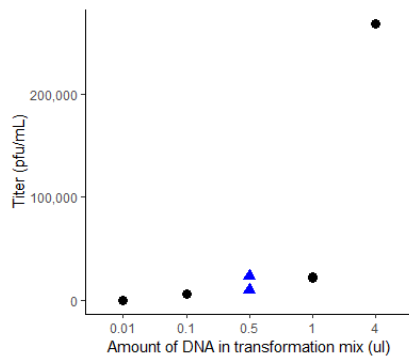

| Dilution | Amount in transformation | Plate dilution | #Plaques | Titer (viruses/mL) |
|----------|--------------------------|----------------|----------|--------------------|
| 0        | 4 uL                     | 1E-3           | 268      | 268,000            |
| 0        | 1 uL                     | 1E-3,1E-2      | 23, 220  | 22,500             |
| 10X      | 1 uL                     | 1E-2           | 57       | 5,700              |
| 100X     | 1 uL                     | 1E-1           | 0        | 0                  |
| 2X       | 1 uL (clean)             | 1E-3,1E-2      | 23, 99   | 16,450             |
